# Supplementary material for: Photoinduced binding of malachite green copolymer to parallel G-quadruplex DNA
Source: Royal Society of Chemistry journal article supplement (doi:10.1039/c9sm00411d), 2019-01-01
Supplement: c9sm00411d1.pdf [file c9sm00411d1.pdf]

Electric Supplementary Information for

**Photoinduced binding of malachite green copolymer to  
parallel G-quadruplex DNA**

Ryoko M. Uda,\* Noriko Nishimoto, Takashi Matsui and Shu Takagi

Department of Chemical Engineering, National Institute of Technology,  
Nara college, Yata 22, Yamato-koriyama, Nara 639-1080, Japan.

\*Corresponding author:

Ryoko M. Uda (ryoko@chem.nara-k.ac.jp)

## Molecular weight and molar fraction data of PVAMG

**Table S1** Molecular weight and molar fraction data of PVAMG

| Copolymer | $M_w$             | $M_w/M_n$ | $x$                  |
|-----------|-------------------|-----------|----------------------|
| PVAMG1    | $8.2 \times 10^4$ | 1.79      | $8.7 \times 10^{-4}$ |
| PVAMG2    | $6.8 \times 10^4$ | 1.84      | $8.3 \times 10^{-4}$ |

The average molar mass ( $M_n$ ) and weight-average molar mass ( $M_w$ ) of PVAMGs are determined by gel permeation chromatography using poly(methyl methacrylate) calibration standards. The molar fraction of the malachite green unit ( $x$ ) was estimated by the NMR spectra of PVAMGs.

### Backward reaction of PVAMG

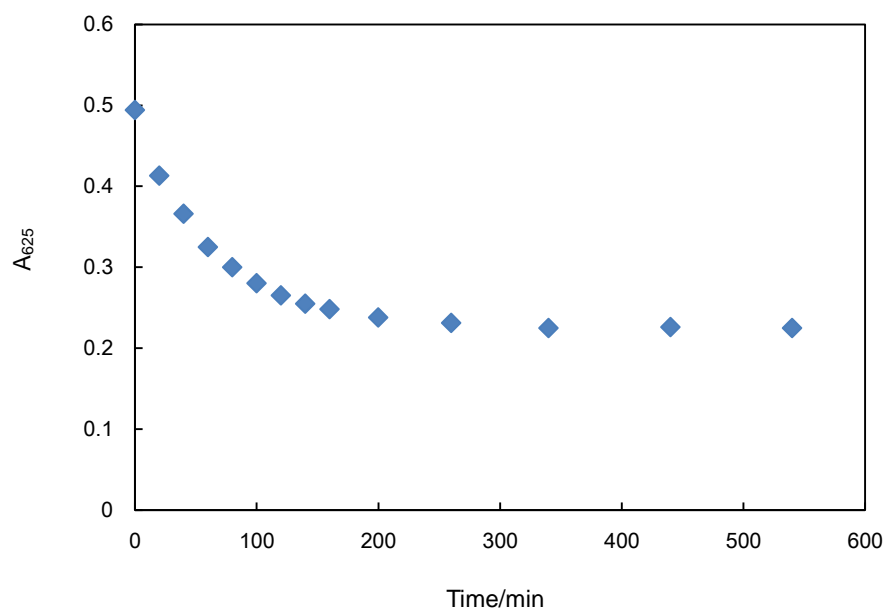

**Figure S1** Time dependence of absorbance at 625 nm ( $A_{625}$ ) for PVAMG2 (0.5g/L) after irradiation for 25 min in Tris-HCl buffer (10 mM, pH 7.4) containing 1 mM EDTA and 100 mM KCl. The solution was kept at 25°C.

## CD spectra of G-quadruplexes

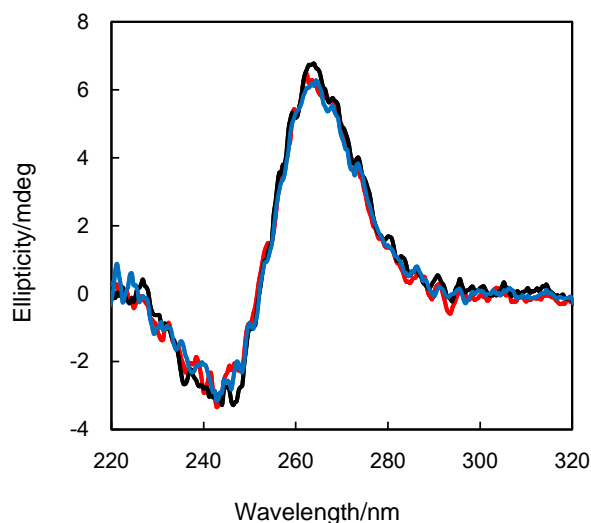

**Figure S2** CD spectra of c-MYC22 (10  $\mu$ M) in Tris-HCl buffer (10 mM, pH 7.4) containing 1 mM EDTA and 100 mM KCl. The concentration of coexisting  $Mg^{2+}$  of PVAMG1 was 0 (black), 34 (red), and 85 (blue)  $\mu$ M. A positive peak at 264 nm and a negative peak at 244 nm are consistent with parallel topology.<sup>1,2</sup>

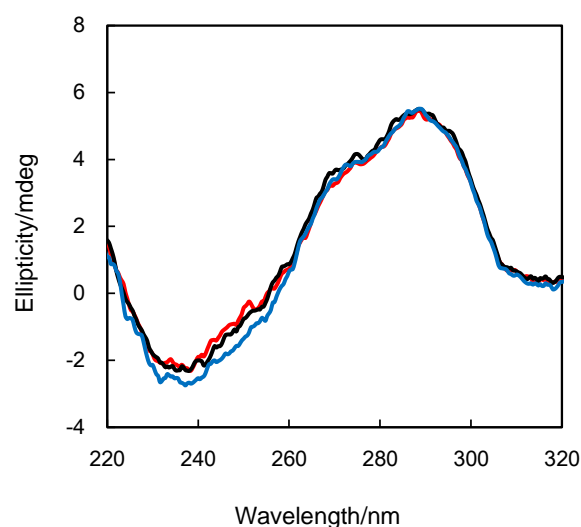

**Figure S3** CD spectra of Telo24 (10  $\mu$ M) in Tris-HCl buffer (10 mM, pH 7.4) containing 1 mM EDTA and 100 mM KCl. The concentration of coexisting  $Mg^{2+}$  of PVAMG2 was 0 (black), 66 (red), and 135 (blue)  $\mu$ M. A large positive peak at 290 nm, indicates contribution from antiparallel structure. The spectra also show a positive shoulder at 275 nm, a small hump at 255 nm, and a negative peak at 238 nm, indicating contributions from parallel topology.<sup>3,4</sup>

- (1) E. Hatzakis, K. Okamoto, D. Yang, *Biochemistry* **2010**, *49*, 9152-9160.
- (2) V. Dapić, V. Abdomerović, R. Marrington, J. Peberdy, A. Rodger, J. O. Trent, P. J. Bates *Nucleic Acids Res.* **2003**, *15*, 2097-2107
- (3) S. D. Verma, N. Pal, M. K. Singh, H. Shweta, M. F. Khan, S. Sen, *Anal. Chem.* **2012**, *84*, 7218-7226.
- (4) X. Zhang, J. Xiang, M. Tian, Q. Yang, H. Sun, S. Yang, Y. Tang, *J. Phys. Chem. B* **2009**, *113*, 7662-7667.

### Estimation of binding constant

The concentrations of PVAMGs were expressed as  $\text{MG}^+$ . The fluorescence intensity at 640 nm of PVAMG or MG oxalate was obtained in the solution containing various amounts of oligonucleotides when the concentration of  $\text{MG}^+$  was maintained at a constant of 2  $\mu\text{M}$ . The binding constant is estimated from the change in the fluorescence using Benesi-Hildebrand equation.<sup>5</sup>

$$1/\Delta F = 1/(K_a \cdot \Delta F_0)[\text{DNA}] + 1/\Delta F_0$$

where  $\Delta F$  is fluorescence intensity change,  $K_a$  is the binding constant, and  $\Delta F_0$  is maximum fluorescence intensity change. We have plotted  $1/\Delta F$  vs  $1/[\text{DNA}]$  in the DNA concentration range from 2 to 20  $\mu\text{M}$ . The double reciprocal plot is linear and the slope gives  $1/(K_a \cdot \Delta F_0)$ . Figure S4 shows plots for the sample of PVAMGs and G-quadruplexes.

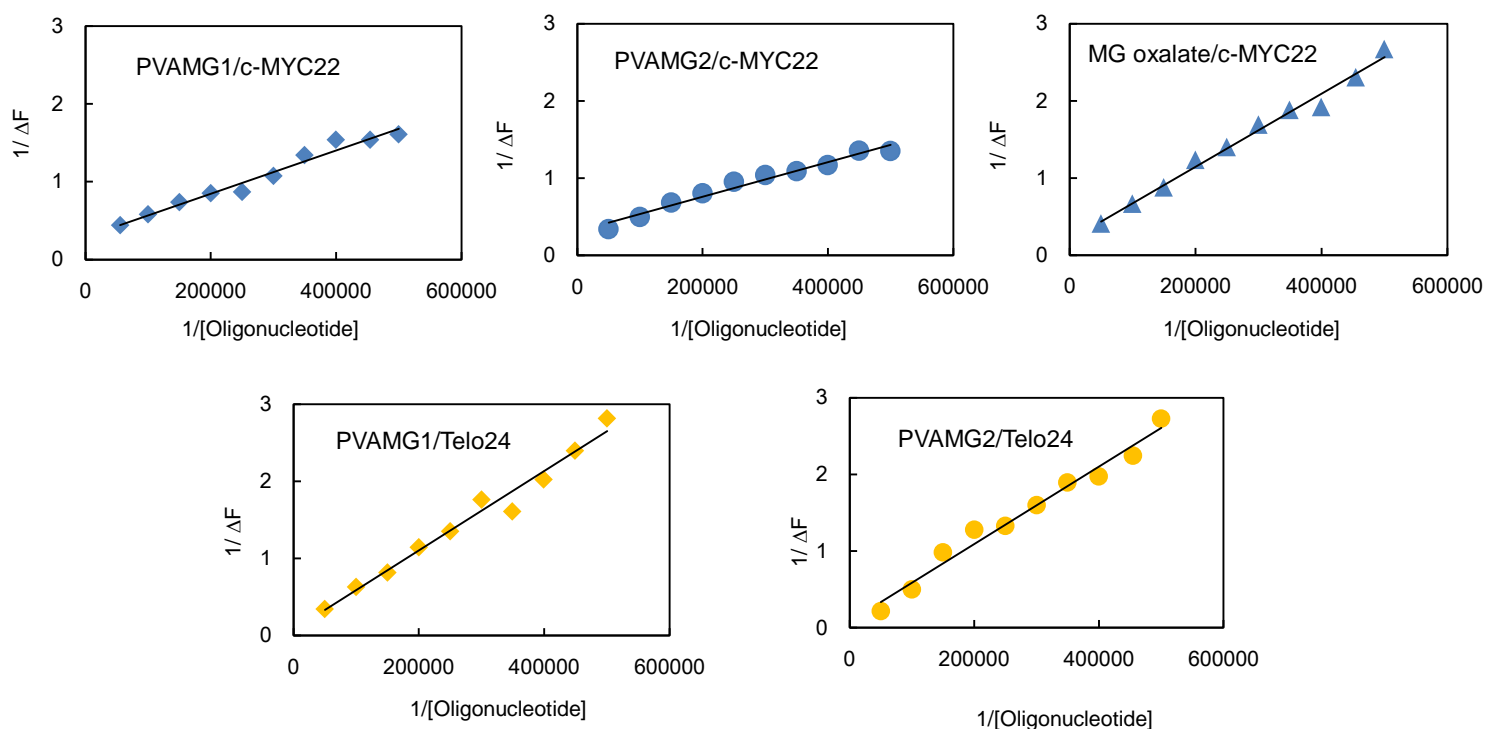

**Figure S4.** Benesi-Hildebrand plots of  $\text{MG}^+$  (2  $\mu\text{M}$ ) and G-quadruplex. The extrapolation of the ordinate corresponds to  $1/\Delta F_0$  and the slope corresponds to  $1/(K_a \cdot \Delta F_0)$ . The fluorescence intensity was calibrated with the fluorescence of 3.0  $\mu\text{M}$  malachite green oxalate in acetate buffer solution (0.1 M, pH 4.0) containing 1.0  $\text{gL}^{-1}$  of poly(vinyl alcohol).

(5) H. A. Benesi, J. H. Hildebrand, *J. Am. Chem. Soc.* **1949**, 71, 2703-2707

## Estimation of binding ratio

(A)

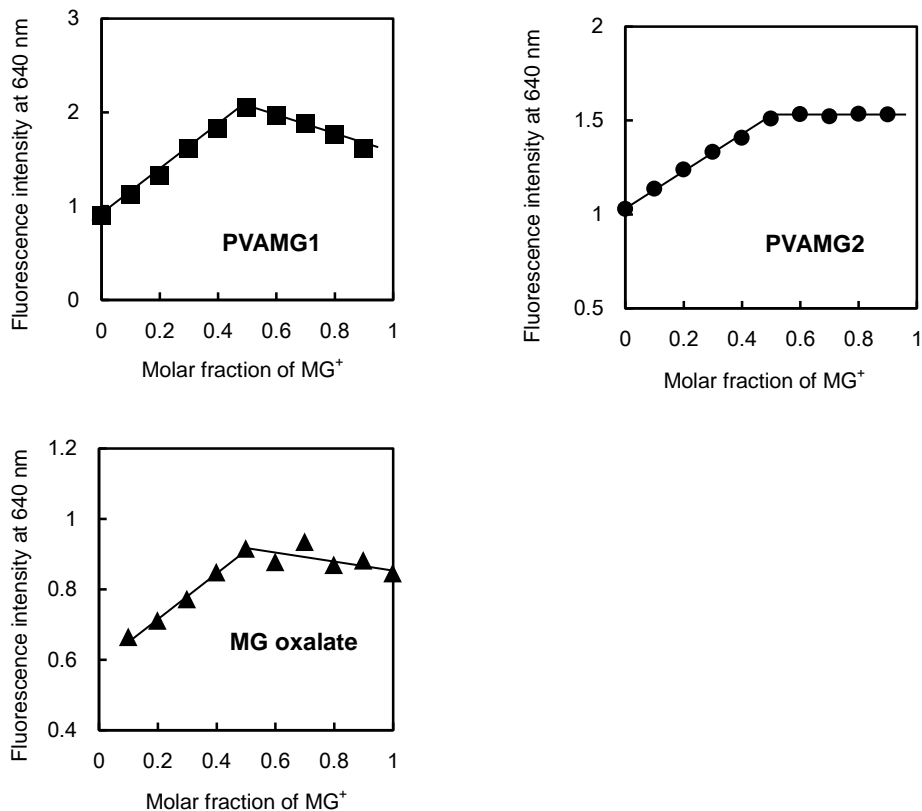

(B)

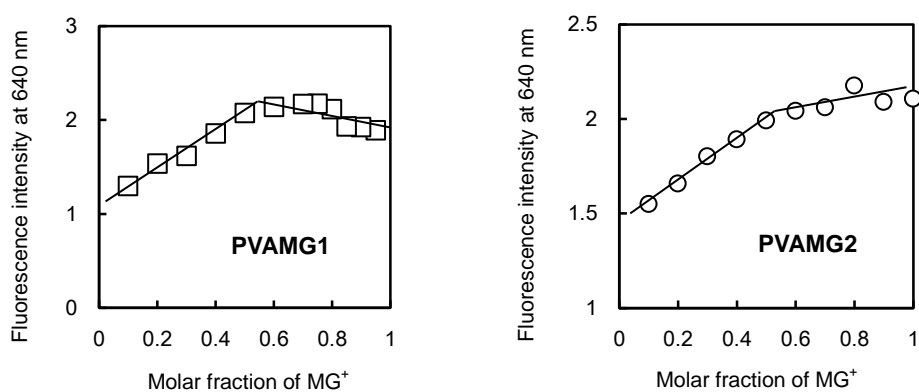

**Figure S5.** Job plots for  $\text{MG}^+$  binding to c-MYC22 G-quadruplex (A) and Telo24 G-quadruplex (B). The total concentration of  $\text{MG}^+$  and G-quadruplex was kept at 4  $\mu\text{M}$ . The fluorescence intensity was obtained by the excitation at 590nm and calibrated with the fluorescence of 3.0  $\mu\text{M}$  malachite green oxalate in acetate buffer solution (0.1 M, pH 4.0) containing 1.0  $\text{gL}^{-1}$  of poly(vinyl alcohol).

## CD spectra of PVAMGs

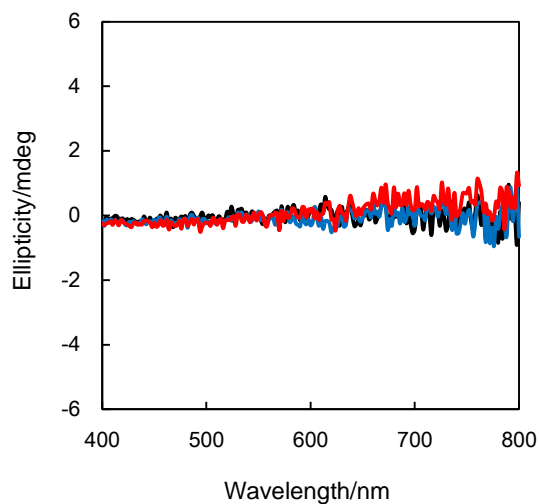

**Figure S6** CD spectra of irradiated PVAMG2 (5  $\mu$ M) binding to c-MYC22 G-quadruplex. The concentration of c-MYC22 was 0 (black), 5 (blue) and 10 (red)  $\mu$ M. 1-cm cell was used.

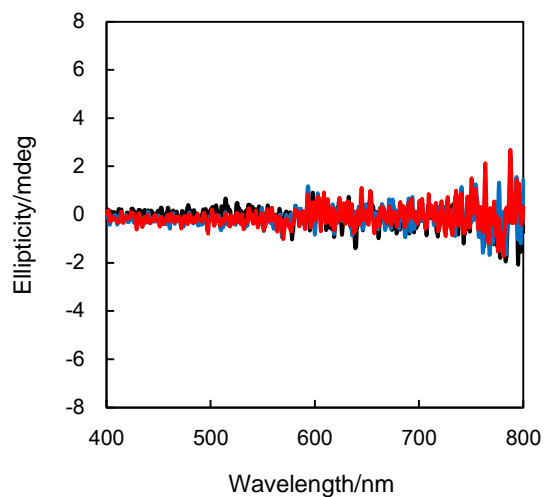

**Figure S7** CD spectra of irradiated PVAMG1 (8  $\mu$ M) binding to Telo24 G-quadruplex. The concentration of Telo24 was 0 (black), 8 (blue), and 16 (red)  $\mu$ M. 1-cm cell was used.

## Temperature dependence of absorbance of PVAMG

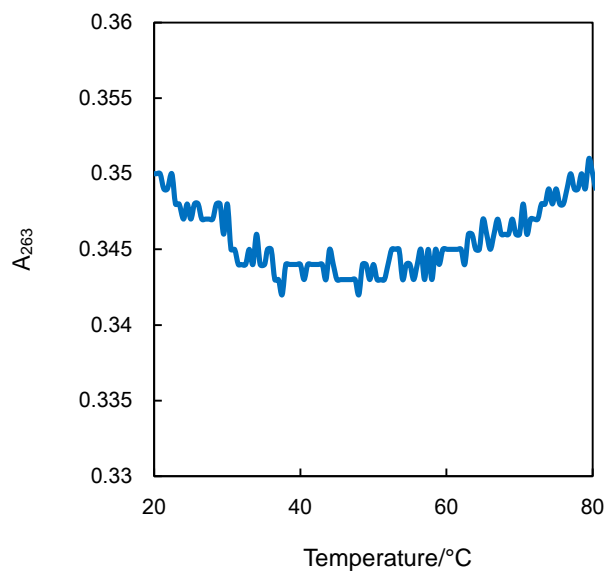

**Figure S8** Temperature dependence of absorbance at 263 nm ( $A_{263}$ ) for PVAMG2 (10  $\mu$ M). The PVAMG2 solution was prepared by using a buffer containing KCl (1 mM) and LiCl (99 mM).

## Polymerase stop assay in the presence of MG oxalate

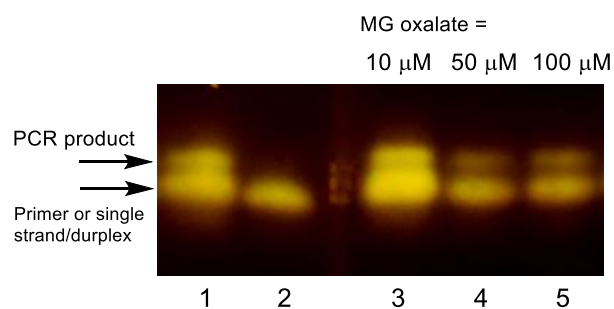

**Figure S9** Effect of MG oxalate binding in polymerase stop assay with G-quadruplex forming c-MYC27 oligomer. (Lane 1) Positive control. (Lane 2) Negative control. 10  $\mu$ M (Lane 3), 50  $\mu$ M (Lane 4), and 100  $\mu$ M (Lane 5), respectively of MG oxalate were added to c-MYC oligomer (5  $\mu$ M).

### Environment of $\text{MG}^+$ in complexing with G-quadruplex

The wavelength at maximum absorbance ( $\lambda_{\text{max}}$ ) of  $\text{MG}^+$  were plotted in Figure S10. The peak of  $\text{MG}^+$  was hardly changed by the interaction with Telo24 quadruplex, while a red shift was observed by c-MYC22 quadruplex. The peak of the triphenylmethane dye in the visible region is red-shifted in a solvent with a low dielectric constant.<sup>6,7</sup> In the other words,  $\text{MG}^+$  binds to c-MYC22 G-quadruplex in the environment more hydrophobic than that in the complex of  $\text{MG}^+$  with Telo24 G-quadruplex.

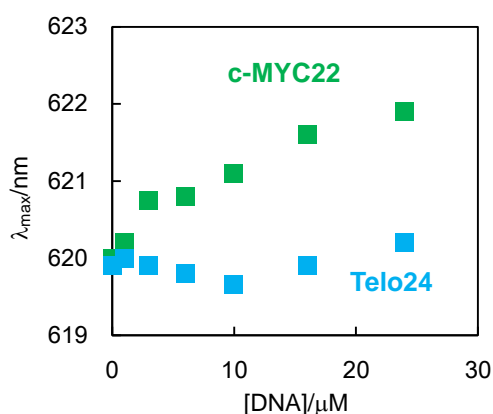

**Figure S10.** Changes in wavelength at maximum absorbance ( $\lambda_{\text{max}}$ ) of  $\text{MG}^+$  of PVAMG1 (5  $\mu\text{M}$ ).

(6) K. K. Karukstis, A. V. Gulledge, *Anal. Chem.* **1998**, 70, 4212–4217

(7) R. M. Uda, K. Kimura, *Colloid Polym. Sci.* **2007**, 285, 699–704.
